# Supplementary material for: Monitoring the athlete training response: subjective self-reported measures trump commonly used objective measures: a systematic review
Source: PubMed Central journal article supplement — Br J Sports Med. 2015 Sep 9;50(5):281–91. doi: 10.1136/bjsports-2015-094758 (PMC4789708; doi:10.1136/bjsports-2015-094758), 2015-09-09
Supplement: bjsports-2015-094758-s1.pdf [file bjsports-2015-094758-s1.pdf]

**Supplementary Table 1** Risk of bias assessment, participant and study characteristics of included studies

| Study                     | Risk of bias assessment criteria |   |   |   |   |       | Participant characteristics |          |            |             |           | Study protocol |             |                  |                    |                   |
|---------------------------|----------------------------------|---|---|---|---|-------|-----------------------------|----------|------------|-------------|-----------|----------------|-------------|------------------|--------------------|-------------------|
|                           | A                                | B | C | D | E | Total | n (total)                   | n (male) | n (female) | Age         | Level     | Sport          | Load        | Duration (weeks) | Subjective measure | Objective measure |
| Berger et al.[58]         | 1                                | 1 | 2 | 2 | 1 | 7     | 8                           | 8        | 0          | Young adult | Elite     | Ind            | Acute (E)   | 6                | POMS               | Physiol, Perf     |
| Bosquet et al.[59]        | 1                                | 1 | 2 | 2 | 0 | 6     | 10                          | 10       | 0          | Adult       | Region    | Ind            | Acute (E)   | 6                | SFMS               | Physiol, Perf     |
| Bresciani et al.[95]      | 1                                | 1 | 2 | 2 | 1 | 7     | 14                          | 14       | 0          | Young adult | Sub-elite | Team           | Chronic (O) | 40               | POMS, RESTQ-S      | Bio (B)           |
| Burrows et al.[96]        | 1                                | 1 | 2 | 1 | 0 | 5     | 20                          | 0        | 20         | Mixed       | Region    | Ind            | Chronic (O) | 12               | Mood               | Bio (S)           |
| Chennaoui et al.[34]      | 1                                | 1 | 1 | 1 | 0 | 4     | 8                           | ?        | ?          | Adult       | ?         | Ind            | Ramadan (O) | 6                | POMS               | Bio (B)           |
| Chtourou et al.[35]       | 1                                | 1 | 1 | 1 | 0 | 4     | 20                          | 20       | 0          | Adolescent  | Region    | Team           | Ramadan (O) | 4                | POMS               | Perf              |
| Coutts & Reaburn[52]      | 1                                | 1 | 1 | 2 | 1 | 6     | 20                          | 20       | 0          | Adult       | Prof      | Team           | Acute (E)   | 7                | RESTQ-S            | Perf              |
| Coutts et al.[57]         | 1                                | 1 | 2 | 2 | 1 | 7     | 16                          | 16       | 0          | Adult       | Sub-elite | Ind            | Acute (E)   | 6                | DALDA              | Physiol, Perf     |
| Coutts et al.[48]         | 1                                | 1 | 2 | 2 | 1 | 7     | 16                          | 16       | 0          | Adult       | Sub-elite | Ind            | Acute (E)   | 6                | RESTQ              | Bio (B), Perf     |
| Dodson[72]                | 0                                | 1 | 1 | 0 | 1 | 3     | 10                          | ?        | ?          | Young adult | Region    | Ind            | Chronic (O) | 12               | RESTQ-S            | Bio (S)           |
| Eloumi et al.[76]         | 1                                | 1 | 1 | 1 | 0 | 4     | 20                          | 20       | 0          | Adult       | Prof      | Team           | Chronic (O) | 14               | SFMS               | Bio (S), Perf     |
| Faude et al.[69]          | 1                                | 1 | 1 | 2 | 1 | 6     | 15                          | ?        | ?          | Young adult | Prof      | Team           | Chronic (O) | 44               | RESTQ-S            | Perf              |
| Filaire et al.[73]        | 1                                | 1 | 1 | 1 | 1 | 5     | 17                          | 17       | 0          | Adult       | Prof      | Team           | Chronic (O) | 32               | POMS               | Bio (S), Perf     |
| Filaire et al.[71]        | 1                                | 1 | 1 | 2 | 1 | 6     | 7                           | 0        | 7          | Adolescent  | Sub-elite | Ind            | Chronic (O) | 28               | RESTQ-S            | Bio (U), Perf     |
| Filaire et al.[70]        | 1                                | 1 | 2 | 2 | 1 | 7     | 12                          | 0        | 12         | Adolescent  | Sub-elite | Ind            | Chronic (O) | 16               | RESTQ-S            | Bio (S)           |
| Filaire et al.[24, 25]    | 1                                | 1 | 1 | 2 | 1 | 6     | 12                          | 12       | 0          | Young adult | Sub-elite | Ind            | Acute (O)   | 32               | POMS, SFMS         | Bio (S,U)         |
| Filaire et al.[97]        | 1                                | 1 | 1 | 2 | 1 | 6     | 12                          | 0        | 12         | Adolescent  | Sub-elite | Ind            | Chronic (O) | 20               | POMS               | Bio (S)           |
| Garatachea et al.[98]     | 1                                | 1 | 1 | 2 | 1 | 6     | 8                           | 5        | 3          | Adolescent  | Elite     | Ind            | Chronic (O) | 42               | POMS, RESTQ-S      | Bio (B)           |
| Gleeson et al.[99]        | 1                                | 1 | 1 | 2 | 0 | 5     | 26                          | 15       | 11         | Young adult | Elite     | Ind            | Chronic (O) | 28               | STAI               | Bio (S)           |
| Gonzalez-Bono et al.[100] | 1                                | 1 | 1 | 2 | 1 | 6     | 20                          | 20       | 0          | Young adult | Prof      | Team           | Chronic (O) | 16               | POMS               | Bio (B)           |
| Halsou et al.[26, 27]     | 1                                | 1 | 1 | 2 | 0 | 5     | 8                           | 8        | 0          | Adult       | Region    | Ind            | Acute (E)   | 6                | POMS,              | Bio (B,S),        |

| Study                 | Risk of bias assessment criteria |   |   |   |   |       | Participant characteristics |          |            |             |           | Study protocol |                     |                  |                         |                   |  |
|-----------------------|----------------------------------|---|---|---|---|-------|-----------------------------|----------|------------|-------------|-----------|----------------|---------------------|------------------|-------------------------|-------------------|--|
|                       | A                                | B | C | D | E | Total | n (total)                   | n (male) | n (female) | Age         | Level     | Sport          | Load                | Duration (weeks) | Subjective measure      | Objective measure |  |
|                       |                                  |   |   |   |   |       |                             |          |            |             |           |                |                     |                  | DALDA                   | Perf              |  |
| Hooper et al.[65]     | 1                                | 1 | 1 | 2 | 1 | 6     | 27                          | 12       | 15         | Mixed       | Region    | Ind            | Acute (E)           | 6                | POMS                    | Perf              |  |
| Jones et al.[101]     | 1                                | 2 | 1 | 2 | 0 | 6     | 75                          | 0        | 75         | Young adult | Region    | Team           | Chronic (O)         | 14               | POMS                    | Perf              |  |
| Jurimae et al.[51]    | 1                                | 1 | 1 | 2 | 1 | 6     | 10                          | 10       | 0          | Adolescent  | Sub-elite | Team           | Acute (E)           | 1                | RESTQ-S                 | Bio (B), Perf     |  |
| Jurimae et al.[50]    | 1                                | 1 | 1 | 2 | 1 | 6     | 21                          | 21       | 0          | Young adult | Sub-elite | Team           | Acute (E)           | 1                | RESTQ-S                 | Bio (B), Perf     |  |
| Kellmann et al.[53]   | 1                                | 2 | 1 | 2 | 1 | 7     | 54                          | 30       | 24         | Adolescent  | Elite     | Team           | Acute (O)           | 6                | POMS, RESTQ-S           | Bio (B), Perf     |  |
| Kentta et al.[102]    | 1                                | 1 | 1 | 2 | 1 | 6     | 11                          | 6        | 5          | Young adult | Elite     | Team           | Acute (O)           | 3                | POMS                    | Perf              |  |
| Koutedakis et al.[66] | 1                                | 1 | 1 | 1 | 1 | 5     | 12                          | ?        | ?          | Adult       | Elite     | Ind            | Acute (E)           | 5                | POMS                    | Perf              |  |
| Kumae et al.[75]      | 1                                | 1 | 1 | 0 | 0 | 3     | 19                          | 19       | 0          | Young adult | Elite     | Ind            | Chronic (O)         | 24               | POMS                    | Bio (B)           |  |
| Lamberts et al.[103]  | 1                                | 0 | 1 | 2 | 1 | 5     | 1                           | ?        | ?          | Adult       | Elite     | Ind            | Chronic (O)         | 10               | DALDA                   | Perf              |  |
| Leti & Bricout[104]   | 1                                | 1 | 1 | 1 | 0 | 4     | 10                          | 10       | 0          | Masters     | Trained   | Ind            | Chronic (O)         | 12               | POMS, SFMS              | Physiol           |  |
| Liederbach et al.[78] | 1                                | 1 | 2 | 2 | 1 | 7     | 12                          | 6        | 6          | Adult       | Prof      | Ind            | Chronic (O)         | 5                | POMS                    | Bio (U)           |  |
| Maestu et al.[49]     | 1                                | 1 | 1 | 2 | 1 | 6     | 12                          | 12       | 0          | Young adult | Elite     | Team           | Chronic (O)         | 6                | RESTQ-S                 | Bio (B), Perf     |  |
| Main et al.[105]      | 1                                | 1 | 2 | 2 | 0 | 6     | 8                           | 8        | 0          | Adult       | Elite     | Team           | Chronic (O)         | 8                | MTDS                    | Bio (B), Perf     |  |
| Main et al.[56]       | 1                                | 1 | 1 | 2 | 0 | 5     | 8                           | 4        | 4          | Young adult | Sub-elite | Team           | Chronic + acute (O) | 8                | PSS                     | Bio (B)           |  |
| Martin et al.[54]     | 1                                | 1 | 1 | 2 | 1 | 6     | 11                          | 11       | 0          | Young adult | Region    | Ind            | Acute (E)           | 10               | POMS                    | Bio (B), Perf     |  |
| Milanez et al.[106]   | 1                                | 1 | 2 | 2 | 0 | 6     | 13                          | 0        | 13         | Young adult | Prof      | Team           | Chronic (O)         | 5                | DALDA                   | Bio (S)           |  |
| Murphy et al.[107]    | 1                                | 1 | 1 | 2 | 0 | 5     | 15                          | 8        | 7          | Adult       | Elite     | Ind            | Acute (E)           | 10               | POMS, CSAI-2, DSC, STPI | Perf              |  |
| O'Connor et al.[64]   | 1                                | 1 | 0 | 1 | 1 | 4     | 14                          | 0        | 14         | Young adult | Region    | Ind            | Acute (O)           | 22               | POMS                    | Bio (S)           |  |
| O'Connor et al.[67]   | 1                                | 1 | 1 | 2 | 1 | 6     | 40                          | 22       | 18         | Young adult | Region    | Ind            | Acute (O)           | 4                | POMS                    | Bio (S), Perf     |  |
| O'Connor et al.[62]   | 1                                | 1 | 1 | 2 | 1 | 6     | 40                          | 22       | 18         | Young adult | Region    | Ind            | Acute (E)           | 1                | POMS                    | Bio (S), Perf     |  |

| Study                         | Risk of bias assessment criteria |   |   |   |   |       | Participant characteristics |          |            |             |           | Study protocol |                     |                  |                    |                       |  |
|-------------------------------|----------------------------------|---|---|---|---|-------|-----------------------------|----------|------------|-------------|-----------|----------------|---------------------|------------------|--------------------|-----------------------|--|
|                               | A                                | B | C | D | E | Total | n (total)                   | n (male) | n (female) | Age         | Level     | Sport          | Load                | Duration (weeks) | Subjective measure | Objective measure     |  |
| Papacosta et al.[108]         | 1                                | 1 | 2 | 2 | 0 | 6     | 11                          | 11       | 0          | Young adult | Region    | Ind            | Acute (E)           | 5                | POMS               | Bio (S), Perf         |  |
| Purge et al.[109]             | 1                                | 1 | 2 | 2 | 1 | 7     | 11                          | 11       | 0          | Young adult | Elite     | Team           | Chronic + acute (O) | 24               | RESTQ-S            | Bio (B), Perf         |  |
| Raglin et al.[63]             | 1                                | 1 | 1 | 1 | 1 | 5     | 12                          | 0        | 12         | Young adult | Region    | Ind            | Chronic (O)         | 16               | POMS               | Perf                  |  |
| Rama et al.[77]               | 1                                | 1 | 1 | 1 | 0 | 4     | 13                          | 13       | 0          | Young adult | Elite     | Ind            | Chronic (O)         | 7                | POMS               | Bio (B,S),<br>Physiol |  |
| Robson-Ansley et al.[60]      | 1                                | 1 | 1 | 1 | 0 | 4     | 8                           | 8        | 0          | Adult       | Region    | Ind            | Acute (E)           | 4                | DALDA              | Bio (B,S)             |  |
| Rollo et al.[110]             | 1                                | 1 | 1 | 1 | 1 | 5     | 30                          | 30       | 0          | Young adult | Sub-elite | Team           | Chronic (O)         | 6                | RESTQ-S            | Perf                  |  |
| Rouveix et al.[74]            | 1                                | 1 | 2 | 2 | 1 | 7     | 7                           | 0        | 7          | Adolescent  | Elite     | Ind            | Chronic (O)         | 28               | POMS               | Bio (U), Perf         |  |
| Santhiago et al.[111]         | 1                                | 1 | 2 | 2 | 0 | 6     | 10                          | 0        | 10         | Young adult | Elite     | Ind            | Chronic + acute (O) | 14               | POMS               | Bio (B), Perf         |  |
| Schultz de Arruda et al.[112] | 1                                | 1 | 1 | 0 | 1 | 4     | 12                          | 0        | 12         | Adult       | Elite     | Team           | Chronic (O)         | 6                | POMS               | Bio (S)               |  |
| Silva et al.[113]             | 1                                | 1 | 1 | 2 | 0 | 5     | 15                          | 15       | 0          | Adult       | Prof      | Team           | Chronic (O)         | 12               | POMS               | Bio (B), Perf         |  |
| Umeda et al.[61]              | 1                                | 1 | 1 | 2 | 0 | 5     | 13                          | 0        | 13         | Young adult | Region    | Ind            | Acute (O)           | 1                | POMS               | Bio (B)               |  |
| Verde et al.[55]              | 1                                | 1 | 1 | 2 | 0 | 5     | 10                          | 10       | 0          | Adult       | Region    | Ind            | Acute (E)           | 9                | POMS               | Bio (B), Perf         |  |
| Wallace et al.[114]           | 1                                | 1 | 0 | 1 | 1 | 4     | 7                           | ?        | ?          | Adult       | Trained   | Ind            | Chronic (O)         | 15               | POMS               | Physiol, Perf         |  |
| Wittig et al.[115]            | 1                                | 1 | 1 | 1 | 0 | 4     | 10                          | 10       | 0          | Adult       | Region    | Ind            | Acute (E)           | 8                | POMS               | Perf                  |  |
| Wood et al.[116]              | 1                                | 0 | 1 | 2 | 1 | 5     | 1                           | 1        | 0          | Adult       | Region    | Ind            | Chronic (O)         | 12               | POMS               | Perf                  |  |

Abbreviations: professionals (Prof), individual (Ind), observational study (O), experimental study (E), biochemical (Bio) from blood (B), saliva (S), or urine (U), physiological (Physiol), and performance (Perf).
